# Supplementary material for: Probabilistic, spinally-gated control of bladder pressure and autonomous micturition by Barrington’s nucleus CRH neurons
Source: eLife. 2020 Apr 29;9:e56605. doi: 10.7554/eLife.56605 (PMC7217699; doi:10.7554/eLife.56605)
Supplement: Figure 1—source data 1. [file elife-56605-fig1-data1.xlsx]

## Sheet: Figure 1
Figure 1
Figure 1E
Effect of 20Hz optoactivation of BarrCRH neurons for 3 micturition cycles.
		Intervoid interval (s)								Voiding threshold (mmHg)
		baseline	5Hz	recovery	10Hz	recovery	20Hz	recovery		baseline	5Hz	recovery	10Hz	recovery	20Hz	recovery
		130.033	93.7667	134.7	100.733	168.4	117.433	152.25		4.371	3.61333	3.95	3.52333	4.48	3.80667	4.125
		390.033	320.6	358	281.5	302.5	220.167	252.05		3.20333	2.515	2.87	2.745	2.305	2.58333	3.31
		170.5	59.3333	188	100.833	133.033	77.8	190.7		4.27333	2.82333	5.115	3.55	3.68333	2.92	4.06667
		103.6	80.8	93.8	94.5333	96.7667	95.7	97.0167		9.35667	8.55	9.17	9.18	9.13333	9.45667	9.5
		431.067	293	352.067	244.933	401.8	369.767	421.133		4	3.91667	4.55	3.815	4.94333	3.92333	5.47667
		193.1	138.533	210.6	133.4	177.7	126.567	200.133		9.35667	8.36	8.07333	6.67	7.50667	8.14667	7.54
		149.933	93.1333	184.2	82.2	97.7333	95.1	119.667		8.23333	7.1	9.65	6.49667	7.33667	8.14667	8.43333
