# Supplementary material for: Probabilistic, spinally-gated control of bladder pressure and autonomous micturition by Barrington’s nucleus CRH neurons
Source: eLife. 2020 Apr 29;9:e56605. doi: 10.7554/eLife.56605 (PMC7217699; doi:10.7554/eLife.56605)
Supplement: Figure 2—source data 1. [file elife-56605-fig2-data1.xlsx]

## Sheet: Figure 2
Figure 2
Figure 2C
Effect of chemogenetic inhibition of BarrCRH:hM4Di neurons on cystometry
	BarrCRH:hM4Di		Micturition Pressure (mmHg)					BarrCRH:mCherry		Micturition Pressure (mmHg)						BarrCRH:hM4Di		Threshold Pressure (mmHg)					BarrCRH:mCherry		Threshold Pressure (mmHg)						BarrCRH:hM4Di		Infused volume (µl)					BarrCRH:mCherry		Infused volume (µl)						BarrCRH:hM4Di		Basal pressure (mmHg)
		baseline	20 mins	40 mins	60 mins	80 mins			baseline	20 mins	40 mins	60 mins	80 mins				baseline	20 mins	40 mins	60 mins	80 mins			baseline	20 mins	40 mins	60 mins	80 mins				baseline	20 mins	40 mins	60 mins	80 mins			baseline	20 mins	40 mins	60 mins	80 mins				baseline	20 mins	40 mins
		21.4333	27.1	25.7	25.65	16.3			19	21.65	20.85	22.2	22.3				7.4	8.55	8.2	10.2	7.5			19	21.65	20.85	22.2	22.3				17.7444	46	14.1583	11.6917	18.6667			126.646	132.354	140.625	125.5	121.542				5.83333	5.15	7.4
		18.45	26.45	18.8	18.6	18.35			10.7	11.6	12.85	12.8	13.3				4.55	5.1	3.65	4	4.55			10.7	11.6	12.85	12.8	13.3				23.4833	52.1167	32.125	24.1667	18.7167			22.7083	19.3917	29.3167	13.9083	13.4083				3.4	3.7	2.8
		12.85	19.55	22.4	22.35	22.05			24.25	23.65	25.3	24.1	24.9				5.15	9.8	10.95	9.515	9.2			24.25	23.65	25.3	24.1	24.9				49.8833	86.05	96.1	124.983	98.9			59.05	62.3333	73.8667	71.8167	83.1833				3.45	4.9	6.05
		22.95	25.2	23.95	24.95	23.55			25.85	28.6	26.8667	28.8667	28.9667				8	8.45	6.8	7.5	6.65			25.85	28.6	26.8667	28.8667	28.9667				32.4667	34.7	27.425	25.5	26.7			119.267	85.1333	95.3556	80.6333	81.1667				4.15	4.4	4.45
		17.8	21.7	21.8	21.9	23.5			12.15	11	10.35	10.05	9.7				5.85	6.5	6.4	6.45	6.4			12.15	11	10.35	10.05	9.7				119.9	157.833	197.733	181.667	172.2			49.2	48.35	42.7667	53.0667	50.3667				3.3	3.4	3.05
		14.8	18.95	19.85	20.05	19.3			18.7	17.5	16.75	18.3	17.05				6.35	9.2	9.5	7.35	8.9			18.7	17.5	16.75	18.3	17.05				115.6	188.267	115.5	112	122.267			15.1833	12.5583	14.6667	12.1917	10.6917				2.7	4.1	6
		14.7	25.4	25.85	24.8	24.5			28.4	30.1	31.8	30.25	29.8				5.1	6.85	6.7	6.2	6.2			28.4	30.1	31.8	30.25	29.8				81.1667	111.675	146.275	136.95	140.675			35.2	35.075	33.45	38.2167	30.85				3.46667	3.65	3.65
		16.15	17.8	16.8	21	18.8			14.6	12.2	12	11.1	10.8				8.25	9.35	9.5	10.6	9.2			14.6	12.2	12	11.1	10.8				111.5	121	151	142	141.8			120.083	99.4375	89.25	86.8958	86.8958				3.55	3.5	3.5
		14.05	17	18.3	18.05	16.5			9.85	10.05	11.5	10.3	8.5				5.65	7.9	6.55	6.5	6.25			9.85	10.05	11.5	10.3	8.5				52.7	82.1667	89.2	92.0833	80.7667			55.4167	55.8333	56.5833	39.2917	15.625				3.05	4.15	2.45
Figure 2E
Effect of chemogenetic inhibition of BarrCRH using intermittent bladder infusion protocol
	BarrCRH:hM4Di		Time after start of infusion (s)
		baseline	20mins	40mins	60mins	120mins
		157.5	878.6	878.6	878.6	364.5
		256.7	835.8	729.2	722	426.5
		183.8	687.8	478	708	478
		214.9	536.5	385.2	545	811.6
		221.9	753.4	743	705.2	691.5
[truncated: 7 more columns]
