# Supplementary material for: Probabilistic, spinally-gated control of bladder pressure and autonomous micturition by Barrington’s nucleus CRH neurons
Source: eLife. 2020 Apr 29;9:e56605. doi: 10.7554/eLife.56605 (PMC7217699; doi:10.7554/eLife.56605)
Supplement: Figure 3—source data 1. [file elife-56605-fig3-data1.xlsx]

## Sheet:  Figure 3
Figure 3
Figure 3D									Figure 3E
	The influence of unilateral optostimulation parameters on eNVC amplitude and probability.
	Frequency
		eNVC amplitude (mmHg)								eNVC probability (%)
		light in naïve mice		sham light	2.5 Hz	5 Hz	10 Hz	20 Hz		light in naïve mice		sham light	2.5 Hz	5 Hz	10 Hz	20 Hz
		0		0	0.65	0.85	1.32	2.11		0		0	60	80	100	100
		0		0	0.69	1.58	2.89	5.84		0		0	100	100	100	100
		0		0	1.04	1.41	2.7	3.27		0		0	80	100	100	100
		0		0.42	0.47	1.93	1.19	2.79		0		40	60	80	100	100
		0		0	1.2	1.28	1.85	4.81		0		0	40	80	80	80
		0		0	0.68	0.64	0.57	0.92		0		0	60	80	60	100
				0	1.85	3.95	5.9	7.57				0	100	100	100	100
	Pulse duration
		eNVC amplitude (mmHg)								eNVC probability (%)
		light in naïve mice		sham light	5 ms	10 ms	20 ms	30 ms		light in naïve mice		sham light	5 ms	10 ms	20 ms	30 ms
		0		0	1.15	1.03	0.88	0.87		0		0	80	100	80	100
		0		0.42	2.98	5.14	7.54	10.09		0		0	100	100	100	100
		0		0	2.14	1.99	3.33	1.4		0		0	100	100	100	100
		0		0	0.19	0.52	1.41	2.12		0		40	80	80	100	100
		0		0	1.47	1.23	4.81	4.1		0		0	80	80	80	80
		0		0	2.46	4.24	1.54	3.66		0		0	60	80	100	100
				0	4.06	6.85	7.57	7.85				0	100	100	100	100
	Higher Frequency response (10ms pulse width)
		eNVC amplitude (mmHg)								eNVC probability (%)
		light in naïve mice		sham light	20 Hz	50 Hz				light for naive		sham light	20 Hz	50 Hz
		0		0	2.77	3.69				0		0	100	100
		0		0	2.23	3.87				0		0	100	100
		0		0.42	5.14	10.53				0		0	100	100
		0		0	0.52	4.83				0		40	80	80
		0		0	1.23	1.87				0		0	80	100
		0		0	4.24	3.02				0		0	80	80
				0	6.85	8.22						0	100	100
	Long light pulses
		eNVC amplitude (mmHg)								eNVC probability (%)
		light for naive		sham light	1000 ms	2000 ms	3000 ms			light for naive		sham light	1000 ms	2000 ms	3000 ms
		0		0	1.17	1.9	2.72			0		0	100	100	100
		0		0	0.48	0.88	1.43			0		0	100	100	100
		0		0.42	2.24	3.31	4.68			0		0	100	100	100
		0		0	1.59	2.56	4.09			0		0	80	100	100
		0		0	2.09	4.15	6.34			0		40	100	100	100
		0								0
