# Supplementary material for: Probabilistic, spinally-gated control of bladder pressure and autonomous micturition by Barrington’s nucleus CRH neurons
Source: eLife. 2020 Apr 29;9:e56605. doi: 10.7554/eLife.56605 (PMC7217699; doi:10.7554/eLife.56605)
Supplement: Figure 4—source data 1. [file elife-56605-fig4-data1.xlsx]

## Sheet:  Figure 4
Figure 4
Figure 4E
Unilateral vs bilateral optoactivation of BarrCRH neurons.
		NVC amplitude (mmHg)
				Right							Left							Bilateral
		Frequency	mouse #	1	2	3	4	5	6	7	1	2	3	4	5	6	7	1	2	3	4	5	6	7
		2.5 Hz		0.65	0.69	1.24	0.33	1.51	1	3.08	0.79	0.34	0.72	0.83	0.8	0.81	3.52	0.69	0.75	2.53	0.75	2.02	0.81	1.89
		5 Hz		0.85	1.58	1.27	0.76	2.87	0.75	0.75	0.84	0.43	1.11	0.94	2.32	1.02	1.44	1.58	1.93	2.78	0.98	1.37	0.82	4.04
		10 Hz		1.32	2.89	1.69	1.45	1.33	3.21	4.62	1.6	2.89	1.97	2.78	0.59	1.28	1.69	2.69	4.93	3.24	2.06	2.73	1.91	5.05
		20 Hz		2.11	5.84	1.89	1.96	2.62	1.55	4.48	2.55	2.53	1.55	3.9	2.17	1.16	8.16	4.47	12.48	3.48	4.81	5.74	3.35	15.54
		NVC response rate (%)
				Right							Left							Bilateral
		Frequency	mouse #	1	2	3	4	5	6	7	1	2	3	4	5	6	7	1	2	3	4	5	6	7
		2.5 Hz		60	100	100	60	40	20	80	80	60	100	80	40	20	60	80	100	100	100	100	40	100
		5 Hz		80	100	100	80	80	60	100	80	100	100	80	40	80	100	100	100	100	100	40	100	100
		10 Hz		100	100	100	100	60	100	100	100	100	100	100	40	80	100	100	100	100	100	100	100	100
		20 Hz		100	100	100	100	100	100	100	100	100	100	100	60	80	100	100	100	100	100	100	100	100
