# Supplementary material for: Probabilistic, spinally-gated control of bladder pressure and autonomous micturition by Barrington’s nucleus CRH neurons
Source: eLife. 2020 Apr 29;9:e56605. doi: 10.7554/eLife.56605 (PMC7217699; doi:10.7554/eLife.56605)
Supplement: Figure 5—figure supplement 1—source data 1. [file elife-56605-fig5-figsupp1-data1.xlsx]

## Sheet: Figure 5 Supplemental 1
Figure 5 Supplemental 1
Figure 5 Supplemental 1B
	Unilateral versus Bilateral opto-stimulation eNVC
			eNVC Amplitude (mmHg)
	Micturition phase	Stimulation side	Right							Left							Bilateral
		Mouse #	1	2	3	4	5	6	7	1	2	3	4	5	6	7	1	2	3	4	5	6	7
	1		0	0	0.3	0.166667	0.05	0	0.5	0	0	0	0.066667	0.05	0.2	0.7	0.095	0	0.3	0.8	0.3	0.4	1.5
	2		0.08	0.066667	0.533333	0.066667	0.3	0.35	1.1	0.25	0.066667	0.033333	0.6	0.35	0	2.65	0	0.033333	0.6	0.833333	0.45	0.3	5.25
	3		0	0.6	1.16667	0.166667	0.4	0.3	2	0.325	0.21	0.2	0.533333	0.75	0.25	4.05	0.55	0.166667	0.966667	0.866667	0.7	0.9	6.8
	4		0.25	1.4	4	0.833333	0.65	1.35	5.25	0.385	1.93333	1.7	0.633333	1.5	0.7	7.15	1.39	0.066667	5.16667	0.966667	1	2.2	11.9
	5		3.85	1.95333	4.06667	1.26667	2.4	6.45	11.5	3.7	3.13333	3.13333	0.733333	2.45	4.3	10.85	8.95	3.56667	7.1	2.53333	2.45	6.6	15.7
