# Supplementary material for: Probabilistic, spinally-gated control of bladder pressure and autonomous micturition by Barrington’s nucleus CRH neurons
Source: eLife. 2020 Apr 29;9:e56605. doi: 10.7554/eLife.56605 (PMC7217699; doi:10.7554/eLife.56605)
Supplement: Figure 5—figure supplement 2—source data 1. [file elife-56605-fig5-figsupp2-data1.xlsx]

## Sheet: Figure 5 Supplemental 2
Figure 5 Supplemental 2
Dependence of bladder pressure response to electrical stimulation of the pelvic nerve on bladder filling
		Bladder pressure (mmHg)
	Frequency	4Hz							8Hz							16Hz							20Hz
Bladder filling	Mouse#	1	2	3	4	5	6	7	1	2	3	4	5	6	7	1	2	3	4	5	6	7	1	2	3	4	5	6	7
10µl		0.1	1.5	1.2	0.9	0.4	2.2	2	0.7	1.7	3.7	1.2	1.1	3.2	2.9	1	2.6	4.3	1.5	1.7	3.9	3.1	2.6	2.4	3.6	1.2	1.9	3.8	2.4
20µl		0.1	2.2	1.7	1.3	0.9	3.8	3.4	1.5	3.1	3.6	1.8	1.6	4.9	4.7	1.4	3.5	4	1.8	1.6	5.9	4.7	2.6	3.3	3.4	1.7	1.9	5.3	4.5
30µl		0.5	2	2.1	1.6	1.2	5.1	4	1.8	3.7	4	2.2	2	6.7	6	2.2	4	4.6	2.3	1.9	7	6	2.3	4.1	4.2	2	2	6.5	5.9
40µl		1.6	2.7	2.1	2.1	1.6	5.7	4.6	2.2	4.7	4.4	2.7	2.5	7.5	6.6	2.4	5.2	5.1	2.8	2.3	8.3	7.1	2.4	5.2	4.8	2.4	2.3	7.6	7
50µl		2.1	2.9	2.2	2.2	1.9	5.7	4.8	2.5	4.5	4.1	3	2.9	8.1	7.5	2.4	5.5	4.8	3.3	2.7	9.2	8.1	2.8	5.3	4.6	3	2.4	8.6	8
60µl		2.3	3.2	1.6	2.5	2.3	5.3	5.1	2.7	5	3.7	3.7	3.4	8.8	7.6	2.9	5.8	4.6	3.7	3	9.5	8.6	3.3	5.6	4.5	3.3	2.8	9	8.6
70µl		2.7	2.9	1.6	3	2.4	4.9	4.6	3.2	4.5	3.1	4.1	3.5	7.5	7.4	3.9	5	3.7	4.2	3.2	9.3	8.5	3.8	5.2	3.9	3.7	3.2	8.8	8.8
