# Supplementary material for: Probabilistic, spinally-gated control of bladder pressure and autonomous micturition by Barrington’s nucleus CRH neurons
Source: eLife. 2020 Apr 29;9:e56605. doi: 10.7554/eLife.56605 (PMC7217699; doi:10.7554/eLife.56605)
Supplement: Figure 5—source data 1. [file elife-56605-fig5-data1.xlsx]

## Sheet: Figure 5
Figure 5
Figure 5C
amplitude of the optogenetically evoked NVC as the micturition cycle progresses
		eNVC amplitude (mmHg)
			mouse #	Phase (%)
				20	40	60	80	100
			1	0	0.27	0.27	1.995	4.115
			2	0.083333	0.146667	0.826667	0.206667	4.77667
			3	0.973333	3.36	3.42333	4.05	5.91333
			4	0.066667	0.34	0.366667	0.5	2.26667
			5	0.9	1.05	2.8	5.65	7.05
			6	0	0.08	0	0.25	3.85
			7	0	0.066667	0.6	1.4	1.95333
			8	0.3	0.533333	1.16667	4	4.06667
			9	0.166667	0.066667	0.166667	0.833333	1.26667
			10	0.05	0.3	0.4	0.65	2.4
			11	0	0.35	0.3	1.35	6.45
			12	0.5	1.1	2	5.25	11.5
Figure 5E
Relationship between optogentically evoked bladder response and phase of the voiding cycle
			mouse #	No response	Non-voiding contraction	Co-ordinated voiding
			1	28.3803	55.8599	52.5316
			2	26.5435	44.1636	76.1997
			3	18.8291	49.8396	65.6892
			4	12.4048	23.7782	43.7347
			5	34.2305	57.2563	93.5858
			6	37.7017	19.0735	60.2714
			7	18.9996	22.4788	44.8487
			8	32.2466	36.3129	72.6908
