# Supplementary material for: Probabilistic, spinally-gated control of bladder pressure and autonomous micturition by Barrington’s nucleus CRH neurons
Source: eLife. 2020 Apr 29;9:e56605. doi: 10.7554/eLife.56605 (PMC7217699; doi:10.7554/eLife.56605)
Supplement: Figure 6—source data 1. [file elife-56605-fig6-data1.xlsx]

## Sheet: Figure 6
Figure 6
Figure 6D
	eNVC amplitude (mmHg)
	Stimulation	sham light	20ms, 20Hz	1000ms
	Mouse#
	1	0	4.21	3.17
	2	0	0.93	0.89
	3	0	6.8	3.87
	4	0	1.09	3.11
	5	0.5	2.4	2.98
	Response rate (%)
	Stimulation	sham light	20ms, 20Hz	1000ms
	Mouse#
	1	0	80	100
	2	0	80	60
	3	0	100	80
	4	0	80	60
	5	20	100	100
