# Supplementary material for: Probabilistic, spinally-gated control of bladder pressure and autonomous micturition by Barrington’s nucleus CRH neurons
Source: eLife. 2020 Apr 29;9:e56605. doi: 10.7554/eLife.56605 (PMC7217699; doi:10.7554/eLife.56605)
Supplement: Figure 7—source data 1. [file elife-56605-fig7-data1.xlsx]

## Sheet: Figure 7
Figure 7
Figure 7C
Effect of Astressin on amplitude of the optogenetically evoked NVC as the micturition cycle progresses
NVC amplitude (mmHg)
		Baseline							20 minutes after Astressin							120 minutes after Astressin
micturition phase	Mouse#	1	2	3	4	5	6	7	1	2	3	4	5	6	7	1	2	3	4	5	6	7
1		0.233333	0	0	0	0	0.266667	0.3	0.366667	0	0.6	0.9	0.05	0.766667	0.2	0.133333	0	0.2	0	0	0.7	0.4
2		0.433333	0	0.1	0	0.1	0.633333	0.4	0.566667	0	0.4	0	0.55	0.766667	0.4	0.4	0.433333	0.5	0	0.1	0.65	0.3
3		0.7	0.166667	0.5	0.2	0.1	1.33333	0.65	1.4	0.4	1.1	11.8	0.1	1.66667	1.55	0.566667	0.766667	1.2	0.05	0.1	1.35	1.3
4		2.03333	0.366667	1	3.2	0.3	1.56667	1.3	2.56667	5.3	1.2	6.9	1.25	1.8	4.95	1.73333	0.866667	0.5	0.5	0.2	1.2	2
5		4.63333	1.66667	1.1	5	3.25	1.53333	5.3	7.06667	5.6	7.4	22.3	10.7	2.43333	12.3	5.36667	0.433333	1.2	3.1	12.55	1	15.7
		Baseline							20 minutes after Saline							120 minutes after Saline
micturition phase	Mouse#	1	2	3	4	5	6	7	1	2	3	4	5	6	7	1	2	3	4	5	6	7
1		0.166667	0	0.2	0	0	1.3	0	0	0	0.6	0.05	0	1	0	0	0	0	0	0.05	0.4	0
2		0.3	0.433333	0.65	0	0	1.85	1.4	0.15	0	0.35	0.15	0.4	0.7	1.3	0	0	0.5	0	0.05	1.1	2.6
3		0.366667	0.766667	0.9	0.2	0	3.35	4.9	0.4	0	0.7	0.15	0	2.7	7.5	0.4	0	0.5	0.25	0	1.6	3.55
4		1.56667	0.866667	2.25	0.45	0.15	4.05	8.2	0.65	0.6	0.9	0.15	0	2	11.9	0.6	0	0.4	0.6	0.25	1.8	5.6
5		3.66667	0.433333	2.45	2.65	0.95	5.9	13.8	1.05	1.1	4.95	1.75	3	3.1	14.2	0.8	0	5.05	3	2.3	3.4	8.55
Figure 7D
Effect of Astressin on the infused volume before voiding (% basal)
		Saline									Astressin
Time	Mouse#	1	2	3	4	5	6	7	8	9	1	2	3	4	5	6	7	8	9
baseline		100	100	100	100	100	100	100	100	100	100	100	100	100	100	100	100	100	100
20		63.4561	127.757	124.037	94.2708	103.466	69.1376	94.1899	82.5213	110.879	87.6512	56.066	75.4521	110.343	37.4889	78.9962	93.5248	98.7482	85.5401
40		98.6686	147.607	111.576	90.3357	93.1384	59.4267	107.794	115.071	51.046	86.2147	63.3216	79.9955	87.4874	64.3143	78.1506	92.3869	91.71	72.7827
60		100.51	137.397	117.891	64.5833	96.4395	102.199	60.6046	72.7014	112.273	71.0182	59.576	92.3746	70.1816	50.4898	83.0606	77.7025	92.1587	82.955
120		93.0595	109.235	153.719	129.977	95.0483	134.643	73.76	72.3033	103.173	87.8906	68.8928	73.5244	32.5933	58.593	96.1948	96.1257	100.213	77.0912
