# Supplementary material for: Probabilistic, spinally-gated control of bladder pressure and autonomous micturition by Barrington’s nucleus CRH neurons
Source: eLife. 2020 Apr 29;9:e56605. doi: 10.7554/eLife.56605 (PMC7217699; doi:10.7554/eLife.56605)
Supplement: Figure 10—figure supplement 1—source data 1. [file elife-56605-fig10-figsupp1-data1.xlsx]

## Sheet: Figure 10 Supplemental 1
Figure 10 - figure supplement 1
Figure 10 - figure supplement 1C
Firing rate at peak of void (zscored)
		BarrCRH	BarrCRH-like	LC	Non-identified
		3.20249	3.68103	0.194661	2.20516
		2.57099	2.96872	0.950924	-1.93105
		2.90502	3.69235	0.904767	0.012956
		3.11895	3.75538	0.630128	0.086482
		1.84227	0.989199	0.825734	0.22448
		2.94337	1.93718	0.479417	-0.693
		2.5991	1.82255	0.446605	0.860109
		2.111	1.80964	0.039797	-1.9815
		3.01521	1.04997	0.68794	0.147864
		2.33914	1.34341	0.73709	0.011536
		0.848822	1.98288	0.031606	-0.11708
		2.5033	2.55668	1.61519	0.119104
			2.60611	0.949464	-0.74024
			0.853584	1.18926	0.42894
			2.0372	0.946325	1.39715
			2.77619	0.956789	2.17286
			2.73305	1.37495	-0.06271
			2.22062	1.37727	0.218264
			2.69989	0.084374	-0.123
			2.86355	0.439548	-0.27473
			2.70079	0.609977	0.143435
			3.10123	0.267862	0.306135
			1.55343	0.224717	-0.2261
			2.99508	0.642692	0.38406
			2.31477	0.087532	-0.19117
			3.07244	0.02501	-0.50198
			2.77041	0.90423	-0.60379
			1.7893	0.99191	-0.01354
			3.23464	0.907502	0.575524
			3.23556		-0.12095
			1.5524		0.509422
			3.01135		0.390915
					1.02523
					0.571269
