# Supplementary material for: Probabilistic, spinally-gated control of bladder pressure and autonomous micturition by Barrington’s nucleus CRH neurons
Source: eLife. 2020 Apr 29;9:e56605. doi: 10.7554/eLife.56605 (PMC7217699; doi:10.7554/eLife.56605)
Supplement: Figure 11—source data 1. [file elife-56605-fig11-data1.xlsx]

## Sheet:  Figure 11
Figure 11
Figure 11B
BarrCRH neuronal firing evoked by light across the phases of the micturition cycle ( peak firing rate or the change in firing)
		Change in Firing rate (Hz)
				cell #	1	2	3	4	5	6
		Micturition phase	Light
			off		2	8	2	5	5	7
		1	on		21	25	19	20	16	19
			off		3	7	4	7	6	5
		2	on		24	30	23	23	12	20
			off		0	0	7	5	6	4
		3	on		27	30	19	23	14	19
			off		3	2	2	9	2	6
		4	on		25	30	23	29	16	17
			off		5	2	3	15	4	7
		5	on		19	32	14	29	18	23
			off		0	2	2	7	4	8
		Peak Firing rate (Hz)
				cell #	1	2	3	4	5	6
		Micturition phase
		1			21	25	19	20	16	19
		2			24	30	23	23	12	20
		3			27	30	19	23	14	19
		4			25	30	23	29	16	17
		5			19	32	14	29	18	23
		NVC amplitude (mmHg)
		Micturition phase		Mouse #	1	2	3	4	5	6
		1			0.1	0.1	0.1	0	0.2	0.2
		2			0.1	0.1	0.1	0.1	0.1	0.1
		3			0.1	0.1	0.1	0.1	0.5	0.5
		4			0.4	0.4	0.4	0.9	1.8	1.8
		5			2.9	2.9	2.9	1.6	2.2	2.2
Figure 11E
Linear regression between the number of spikes in each BarrCRH burst and amplitude of following sNVC
		number of spikes	NVC amp (mmHg)
		1	0.19161
		1	0.328559
		1	0.228319
		2	1.72352
		1	0.255205
		2	0.22337
		2	0.225729
		1	0.228508
		18	0.712115
		6	0.137494
		16	0.601636
		8	0.445935
		14	0.512145
		14	0.258547
		8	0.141911
		9	0.138751
		16	0.375804
		28	0.878887
		7	0.36491
		20	1.08415
		11	0.170364
		17	0.214602
		16	0.264772
		21	0.5759
		18	1.1546
		25	0.418263
		24	0.786787
		18	0.150152
		11	1.13968
		4	0.165481
		15	0.289171
		14	0.00855913
		25	0.558623
		13	0.198392
		3	0.298609
		5	2.74562
		2	0.172272
		1	0.239606
		7	2.68453
		1	0.210962
		1	0.16202
		1	0.385109
		4	0.99716
		8	4.14914
		4	0.18302
		22	2.74562
		1	0.172272
		7	0.239606
		14	2.68453
		2	0.210962
		5	0.14115
		1	0.16202
		9	0.385109
		4	0.316976
		1	0.147748
		4	0.99716
		23	4.14914
		3	0.18302
		2	0.205173
		8	0.383012
		5	0.17339
		3	0.930492
		7	0.227281
		3	0.122857
		14	0.121633
		8	0.441577
		9	0.415238
		9	0.149749
		3	1.63317
		3	0.185408
		11	0.12931
		5	0.224369
		7	0.494498
		12	0.531027
		3	0.205173
		11	0.383012
		9	0.17339
		8	0.930492
		5	0.227281
		1	0.122857
		10	0.121633
		7	0.441577
		10	0.415238
		9	0.149749
		1	1.63317
		4	0.185408
		9	0.12931
		4	0.224369
		4	0.494498
		14	0.531027
		1	0.17339
		4	2.42487
		6	0.930492
		1	0.441577
		6	0.531027
		3	0.230604
		5	0.177108
		2	0.578309
		11	2.14318
		8	1.1025
		1	0.146476
		2	1.42322
		2	0.177108
		4	0.431723
		1	0.752981
		1	0.402805
		2	0.462453
		13	2.14318
		1	1.1025
		1	0.230604
		1	0.149699
		2	2.14318
		2	0.149699
		2	0.177108
		2	0.578309
		7	0.431723
		3	0.752981
		13	2.14318
		4	1.1025
		1	0.146476
		5	1.42322
		10	0.431723
		2	0.752981
		4	0.402805
		3	0.462453
		8	2.14318
		3	1.1025
